# Supplementary material
Source: ML conference proceedings conference paper supplement (https://proceedings.neurips.cc/paper_files/paper/2023/hash/4958a8ad01f524de2ec5274678ffa5a4-Abstract.html)
Supplement: Supplementary file 1 [file 4958a8ad01f524de2ec5274678ffa5a4-Supplemental-Conference.pdf]

## 1 Appendix

### 2 A Investigation of Embedding Dynamics

3 We investigated if there are underlying structures within the embeddings during their evolution. To  
4 this end, we looked into the embeddings of the 34 locations on *Server Room* dataset at five time  
5 points ( $t = 1, 20, 50, 80, 100$ ). At each time point, we ran the k-means algorithm over the embeddings  
6 to extract the clustering structures. We used the elbow method (Ketchen and Shook, 1996) to select  
7 the number of clusters. We can see that at earlier time ( $t \leq 50$ ), the clusters are more compact,  
8 while at the later stages, the clusters become more scattered. This reflects how the structure of those  
9 entities (*i.e.*, locations) evolves along with time. It is interesting to see that some locations are in the  
10 same cluster all the time, like location {5,7} and location {16, 32}. It implies that their underlying  
11 properties might have quite similar (or correlated) evolution patterns. Some locations are grouped in  
12 the cluster at the beginning, *e.g.*, location {32, 34} (at  $t = 1$ ), but later moves to different clusters  
13 ( $t > 1$ ). It implies their evolution patterns can vary significantly, leading to the change of the cluster  
14 memberships.

### 15 References

- 16 Ketchen, D. J. and Shook, C. L. (1996). The application of cluster analysis in strategic management  
17 research: an analysis and critique. *Strategic management journal*, 17(6):441–458.

|           | <i>CA Weather</i> | <i>CA Traffic</i> | <i>Server Room</i> |
|-----------|-------------------|-------------------|--------------------|
| CP-DTLD   | 0.037             | 0.086             | 0.023              |
| GP-DTLD   | 0.246             | 0.247             | 0.248              |
| NN-DTLD   | 2.400             | 4.730             | 1.080              |
| CP-DTND   | 0.038             | 0.087             | 0.025              |
| GP-DTND   | 0.119             | 0.242             | 0.080              |
| NN-DTND   | 2.360             | 4.701             | 1.060              |
| CP-CT     | 0.025             | 0.052             | 0.018              |
| GP-CT     | 0.068             | 0.216             | 0.105              |
| NN-CT     | 2.310             | 3.885             | 1.030              |
| NONFAT    | 0.952             | 1.925             | 0.571              |
| THIS-ODE  | 58.710            | 136.100           | 7.190              |
| DEMOTÉ    | 1.390             | 1.895             | 0.309              |
| DEMOTÉ-NS | 6.12              | 10.42             | 7.06               |

Table 1: Per-epoch/iteration running time (in seconds). DEMOTÉ-NS means running DEMOTÉ with naive sampling of min-batches rather than the stratified sampling.

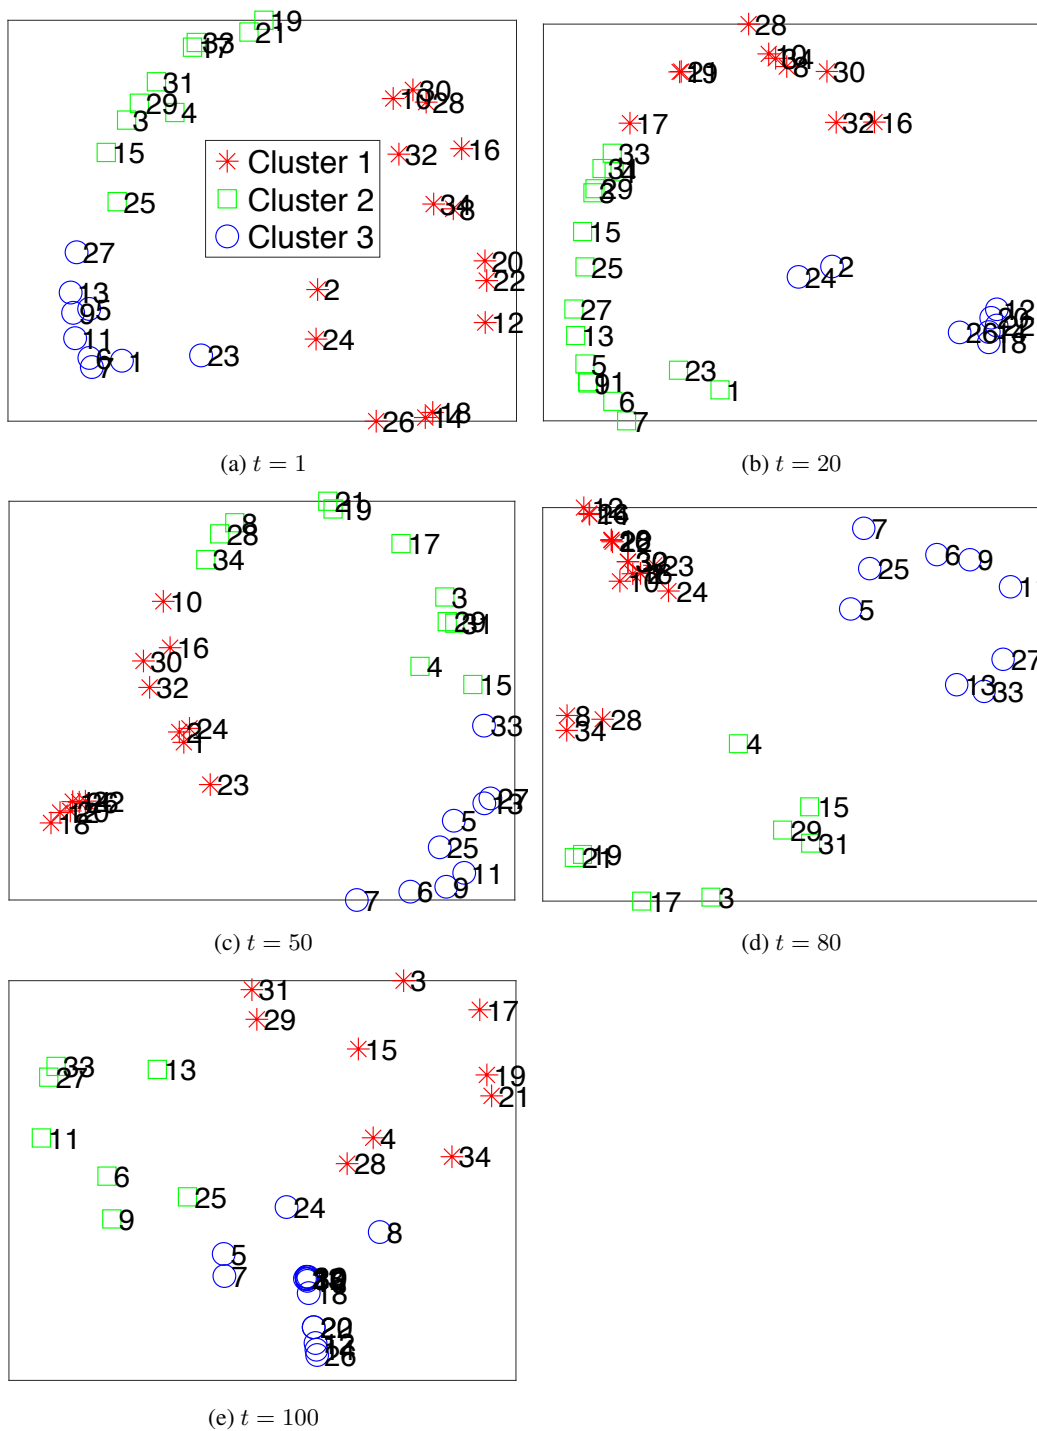

Figure 1: Evolution of the clustering structure within the 34 locations on *Server Room* dataset.
